# Supplementary material for: Green synthesis of polypyrrole-supported metal catalysts: application to nitrate removal in water
Source: Royal Society of Chemistry journal article supplement (doi:10.1039/c5ra03441h), 2015-01-01
Supplement: c5ra03441h1.pdf [file c5ra03441h1.pdf]

## Green synthesis polypyrrol-supported metal catalysts: application to nitrate removal in water

M. Jesús García-Fernández, R. Buitrago-Sierra, M. Mercedes Pastor-Blas,  
O.S.G.P. Soares, M.F.R. Pereira and A. Sepúlveda-Escribano

### Supplementary information

Supplementary information Table 1. XPS surface chemical composition (at.%) of the different samples<sup>[a]</sup>.

| <i>Binding energy (eV)</i> | 284.5 | 531.5 | 398.1 | 198.5 | 71.2  | 487.6 | 710.9 |
|----------------------------|-------|-------|-------|-------|-------|-------|-------|
| <i>Element</i>             | C 1s  | O 1s  | N 1s  | Cl 2p | Pt 4f | Sn 3d | Fe 2p |
| PPy-2%Pt-(Pt:Sn)(1:1)      | 74.21 | 13.97 | 4.47  | 3.76  | 1.07  | 2.52  | 0     |
| PPy-2%Pt-(Pt:Sn)(1:1)-P    | 65.15 | 19.12 | 6.05  | 4.32  | 2.07  | 3.29  | 0     |
| PPy-2%Pt-(Pt:Sn)(1:1)-P-R  | 69.24 | 20.68 | 6.26  | 0.49  | 0.68  | 2.65  | 0     |
| PPy-2%Pt-(Pt:Sn)(3:1)      | 71.67 | 4.44  | 12.13 | 11.32 | 0.23  | 0.21  | 0     |
| PPy-2%Pt-(Pt:Sn)(3:1)-P    | 68.65 | 15.40 | 6.71  | 3.27  | 4.21  | 1.76  | 0     |
| PPy-2%Pt-(Pt:Sn)(3:1)-P-R  | 72.42 | 16.16 | 7.88  | 0.61  | 1.37  | 1.56  | 0     |
| PPy-2%Pt                   | 84.15 | 5.68  | 4.98  | 3.53  | 1.66  | -     | 0     |
| PPy-2%Pt-P                 | 70.36 | 14.88 | 8.02  | 2.96  | 3.73  | -     | 0.05  |
| PPy-2%Pt-P-R               | 78.26 | 12.35 | 7.75  | 0.64  | 1.00  | -     | 0     |
| PPy                        | 77.95 | 6.52  | 13.16 | 2.37  | -     | -     | 0     |
| PPy-R                      | 77.52 | 10.26 | 11.48 | 0.37  | -     | -     | 0     |
| PPy-Plasma                 | 71.77 | 14.16 | 12.37 | 1.70  | -     | -     | 0     |
| PPy-Plasma-R               | 73.65 | 13.71 | 12.18 | 0.47  | -     | -     | 0     |

[a] P = plasma; R = recovered catalyst after 300 min of nitrate reduction with hydrogen.

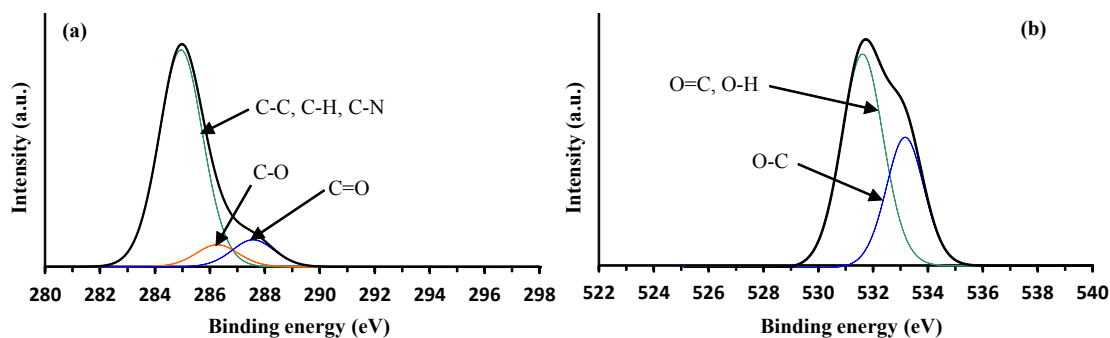

Supplementary information Fig. 1. XPS (a) C 1s and (b) O 1s spectra of as-synthesized polypyrrole.

**Supplementary information Table 2. Atomic percentages of the different surface species estimated from the areas of the contributions to the XPS spectra corresponding to the C 1s level<sup>[a]</sup>.**

| <i>Element</i>        | <i>C 1s</i>                |                     |                            |               |                 |
|-----------------------|----------------------------|---------------------|----------------------------|---------------|-----------------|
| <i>Sample</i>         | <i>Binding energy (eV)</i> | <i>Species</i>      | <i>Composition (at. %)</i> |               |                 |
|                       |                            |                     | <i>No Plasma</i>           | <i>Plasma</i> | <i>Plasma-R</i> |
| PPy-2%Pt-(Pt:Sn)(1:1) | 284.9                      | C - C, C - H, C - N | 63.94                      | 50.61         | 56.92           |
|                       | 286.6                      | C - O               | 6.90                       | 8.04          | 5.42            |
|                       | 288.4                      | C = O               | 3.37                       | 6.50          | 6.90            |
| PPy-2%Pt-(Pt:Sn)(3:1) | 285.1                      | C - C, C - H, C - N | 63.73                      | 51.48         | 61.37           |
|                       | 287.2                      | C - O               | 5.76                       | 10.11         | 6.32            |
|                       | 289.1                      | C = O               | 2.18                       | 7.06          | 4.73            |
| PPy-2%Pt              | 285.1                      | C - C, C - H, C - N | 73.01                      | 52.87         | 65.64           |
|                       | 286.7                      | C - O               | 6.96                       | 10.18         | 9.05            |
|                       | 288.3                      | C = O               | 4.18                       | 7.31          | 3.57            |
| PPy                   | 285.0                      | C - C, C - H, C - N | 63.85                      | 57.71         | 59.70           |
|                       | 286.3                      | C - O               | 6.34                       | 5.26          | 7.31            |
|                       | 287.6                      | C = O               | 7.76                       | 8.80          | 6.64            |

[a] R = recovered catalyst after 300 min of nitrate reduction with hydrogen.

**Supplementary information Table 3. Atomic percentages of the different surface species estimated from the areas of the contributions to the XPS spectra corresponding to the O 1s level<sup>[a]</sup>.**

| <i>Element</i>        | <i>O 1s</i>                |                |                            |               |                 |
|-----------------------|----------------------------|----------------|----------------------------|---------------|-----------------|
| <i>Sample</i>         | <i>Binding energy (eV)</i> | <i>Species</i> | <i>Composition (at. %)</i> |               |                 |
|                       |                            |                | <i>No Plasma</i>           | <i>Plasma</i> | <i>Plasma-R</i> |
| PPy-2%Pt-(Pt:Sn)(1:1) | 531.7                      | O = C, O - H   | 8.37                       | 10.69         | 13.30           |
|                       | 533.1                      | O - C          | 5.60                       | 8.43          | 7.38            |
| PPy-2%Pt-(Pt:Sn)(3:1) | 531.8                      | O = C, O - H   | 2.43                       | 9.04          | 9.40            |
|                       | 533.1                      | O - C          | 2.01                       | 6.36          | 6.76            |
| PPy-2%Pt              | 532.0                      | O = C, O - H   | 3.44                       | 8.90          | 8.62            |
|                       | 533.6                      | O - C          | 2.24                       | 5.98          | 3.73            |
| PPy                   | 531.6                      | O = C, O - H   | 4.20                       | 9.94          | 9.90            |
|                       | 533.2                      | O - C          | 2.32                       | 4.22          | 3.81            |

[a] R = recovered catalyst after 300 min of nitrate reduction with hydrogen.

**Supplementary information Table 4. Atomic percentages of the different surface species estimated from the areas of the contributions to the XPS spectra corresponding to the N 1s level<sup>[a]</sup>.**

| <i>Element</i>        | <i>N 1s</i>                |                |                            |               |                 |
|-----------------------|----------------------------|----------------|----------------------------|---------------|-----------------|
| <i>Sample</i>         | <i>Binding energy (eV)</i> | <i>Species</i> | <i>Composition (at. %)</i> |               |                 |
|                       |                            |                | <i>No Plasma</i>           | <i>Plasma</i> | <i>Plasma-R</i> |
| PPy-2%Pt-(Pt:Sn)(1:1) | 400.1                      | -NH-           | 3.84                       | 4.51          | 1.95            |
|                       | 401.8                      | N <sup>+</sup> | 0.63                       | 1.54          | 4.31            |
| PPy-2%Pt-(Pt:Sn)(3:1) | 400.2                      | -NH-           | 5.03                       | 5.68          | 1.86            |
|                       | 401.9                      | N <sup>+</sup> | 7.10                       | 1.03          | 6.02            |
| PPy-2%Pt              | 399.3                      | =N-            | 1.35                       | 1.75          | 2.25            |
|                       | 400.4                      | -NH-           | 3.63                       | 6.27          | 5.50            |
| PPy                   | 399.7                      | =N-            | 4.65                       | 0             | 3.11            |
|                       | 400.3                      | -NH-           | 8.51                       | 11.24         | 9.07            |
|                       | 401.5                      | N <sup>+</sup> | 0                          | 1.13          | 0               |

[a] R = recovered catalysts after 300 min of nitrate reduction with hydrogen.

**Supplementary information Table 5. Atomic percentages of the different surface species estimated from the areas of the contributions to the XPS spectra corresponding to the Pt 4f level<sup>[a]</sup>.**

| <i>Element</i>                 | <i>Pt 4f</i>     |                            |
|--------------------------------|------------------|----------------------------|
| <i>Sample</i>                  | <i>Species</i>   | <i>Composition (at. %)</i> |
| PPy-2%Pt-(Pt:Sn)(1:1)          | Pt <sup>2+</sup> | 0.09                       |
|                                | Pt <sup>4+</sup> | 0.98                       |
| PPy-2%Pt-(Pt:Sn)(1:1)-Plasma   | Pt <sup>0</sup>  | 0.85                       |
|                                | Pt <sup>2+</sup> | 1.22                       |
| PPy-2%Pt-(Pt:Sn)(1:1)-Plasma-R | Pt <sup>0</sup>  | 0.22                       |
|                                | Pt <sup>2+</sup> | 0.46                       |
| PPy-2%Pt-(Pt:Sn)(3:1)          | Pt <sup>2+</sup> | 0.13                       |
|                                | Pt <sup>4+</sup> | 0.10                       |
| PPy-2%Pt-(Pt:Sn)(3:1)-Plasma   | Pt <sup>0</sup>  | 3.11                       |
|                                | Pt <sup>2+</sup> | 1.11                       |
| PPy-2%Pt-(Pt:Sn)(3:1)-Plasma-R | Pt <sup>0</sup>  | 0.82                       |
|                                | Pt <sup>2+</sup> | 0.55                       |
| PPy-2%Pt                       | Pt <sup>2+</sup> | 1.50                       |
|                                | Pt <sup>4+</sup> | 0.15                       |
| PPy-2%Pt-Plasma                | Pt <sup>0</sup>  | 2.28                       |
|                                | Pt <sup>2+</sup> | 1.45                       |
| PPy-2%Pt-Plasma-R              | Pt <sup>2+</sup> | 0.43                       |
|                                | Pt <sup>4+</sup> | 0.57                       |

[a] R = recovered catalysts after 300 min of nitrate reduction with hydrogen.
